# Supplementary material for: Solvatochromism, halochromism, and preferential solvation of new dipolar guaiazulenyl 1,4-benzoquinone methidesElectronic supplementary information (ESI) available: Absorption maxima of the dyes 6–10 in seven binary solvent mixtures. See http://www.rsc.org/suppdata/ob/b2/b209555f/
Source: Royal Society of Chemistry journal article supplement (doi:10.1039/b209555f), 2003-03-18
Supplement: b209555f.doc [file b209555f.doc]

Solvatochromism, halochromism, and preferential solvation of new dipolar 1-guaiazulenyl-1,4-benzoquinone methides

Table S1 Absorption maxima of the dyes 6-10 in seven binary solvent mixtures.

|  |  | **6** | **7** | **8** | **9** | **10** |
| --- | --- | --- | --- | --- | --- | --- |
| Solvent 1–solvent 2 | *X*2 | **max/nm | **max/nm | **max/nm | **max/nm | **max/nm |
| Ethyl acetate–chloroform | | | | | | |
|  | 0 | 235.5 | 237.9 | 239.6 | 239.6 | 212.2 |
|  | 0.1 | 233.7 | 236.5 | 236.0 | 239.2 | 211.1 |
|  | 0.2 | 232.3 | 235.3 | 234.2 | 239.0 | 210.4 |
|  | 0.3 | 230.8 | 233.9 | 232.3 | 238.2 | 209.9 |
|  | 0.4 | 229.7 | 233.1 | 231.3 | 237.9 | 209.1 |
|  | 0.5 | 227.9 | 232.2 | 229.7 | 237.6 | 208.6 |
|  | 0.6 | 226.9 | 231.7 | 229.1 | 236.9 | 207.7 |
|  | 0.7 | 226.3 | 230.7 | 227.9 | 236.9 | 207.5 |
|  | 0.8 | 224.9 | 230.4 | 227.7 | 235.9 | 206.7 |
|  | 0.9 | 224.4 | 229.5 | 226.7 | 235.7 | 206.2 |
|  | 1 | 224.1 | 229.4 | 226.5 | 235.5 | 206.0 |
| Tri-*n*-butyl phosphate–chloroform | | | | | | |
|  | 0 | 233.4 | 235.1 | 237.9 | 237.8 | 210.1 |
|  | 0.1 | 232.9 | 235.1 | 237.0 | 237.9 | 210.2 |
|  | 0.2 | 232.0 | 234.5 | 235.9 | 237.9 | 210.0 |
|  | 0.3 | 231.2 | 233.8 | 235.2 | 238.0 | 209.9 |
|  | 0.4 | 230.4 | 233.6 | 233.5 | 237.9 | 209.5 |
|  | 0.5 | 229.2 | 232.6 | 231.6 | 237.6 | 209.2 |
|  | 0.6 | 227.9 | 231.6 | 230.1 | 237.5 | 208.4 |
|  | 0.7 | 226.7 | 230.6 | 228.9 | 237.0 | 207.8 |
|  | 0.8 | 225.0 | 230.0 | 227.8 | 236.7 | 207.1 |
|  | 0.9 | 224.2 | 229.6 | 226.9 | 236.2 | 206.5 |
|  | 1 | 223.7 | 229.4 | 226.3 | 235.9 | 206.0 |
| Aceton–chloroform | | | | | | |
|  | 0 | 231.3 | 234.0 | 235.7 | 237.6 | 208.7 |
|  | 0.1 | 230.3 | 232.8 | 233.4 | 236.9 | 208.0 |
|  | 0.2 | 228.6 | 231.9 | 230.8 | 236.6 | 207.4 |
|  | 0.3 | 226.9 | 230.8 | 229.7 | 236.5 | 206.8 |
|  | 0.4 | 226.0 | 230.0 | 228.6 | 236.1 | 205.9 |
|  | 0.5 | 225.2 | 229.7 | 227.0 | 235.9 | 205.8 |
|  | 0.6 | 224.3 | 228.9 | 226.1 | 235.4 | 205.3 |
|  | 0.7 | 224.0 | 228.9 | 226.2 | 235.2 | 205.3 |
|  | 0.8 | 223.6 | 229.0 | 226.4 | 235.3 | 205.2 |
|  | 0.9 | 224.0 | 228.7 | 226.3 | 235.2 | 205.5 |
|  | 1 | 224.2 | 229.3 | 226.5 | 235.3 | 206.0 |
| Chloroform–methanol | | | | | | |
|  | 0 | 224.1 | 229.4 | 216.7 | 235.5 |  |
|  | 0.1 | 216.0 | 224.0 | 215.9 | 233.5 |  |
|  | 0.2 | 214.4 | 222.4 | 215.6 | 231.7 |  |
|  | 0.3 | 212.8 | 220.7 | 215.9 | 230.8 |  |
|  | 0.4 | 212.1 | 219.3 | 216.6 | 230.1 |  |
|  | 0.5 | 211.9 | 218.3 | 217.3 | 229.9 |  |
|  | 0.6 | 211.6 | 217.9 | 218.2 | 229.4 |  |
|  | 0.7 | 211.7 | 217.7 | 219.6 | 229.6 |  |
|  | 0.8 | 211.6 | 217.7 | 221.0 | 229.7 |  |
|  | 0.9 | 212.1 | 218.4 | 223.3 | 230.5 |  |
|  | 1 | 212.6 | 220.3 | 226.5 | 231.2 |  |
| Acetone–methanol | | | | | | |
|  | 0 | 231.1 | 234.0 | 235.6 | 237.6 |  |
|  | 0.1 | 228.5 | 232.0 | 233.4 | 236.8 |  |
|  | 0.2 | 225.2 | 229.7 | 230.7 | 236.4 |  |
|  | 0.3 | 222.4 | 228.3 | 228.8 | 236.5 |  |
|  | 0.4 | 219.3 | 226.2 | 227.0 | 235.7 |  |
|  | 0.5 | 217.9 | 225.0 | 225.2 | 235.0 |  |
|  | 0.6 | 216.4 | 223.7 | 223.6 | 235.0 |  |
|  | 0.7 | 215.2 | 222.4 | 221.8 | 233.9 |  |
|  | 0.8 | 214.0 | 221.3 | 220.2 | 233.6 |  |
|  | 0.9 | 213.7 | 220.4 | 218.5 | 232.0 |  |
|  | 1 | 212.6 | 220.3 | 216.7 | 231.2 |  |
| Acetonitrile–butan-1-ol | | | | | | |
|  | 0 | 228.1 | 231.7 | 231.4 | 235.6 |  |
|  | 0.1 | 223.9 | 229.4 | 229.2 | 234.8 |  |
|  | 0.2 | 220.8 | 227.3 | 227.7 | 234.8 |  |
|  | 0.3 | 218.1 | 225.9 | 226.3 | 234.3 |  |
|  | 0.4 | 217.0 | 224.9 | 225.6 | 234.2 |  |
|  | 0.5 | 216.8 | 224.5 | 224.6 | 234.0 |  |
|  | 0.6 | 216.0 | 224.1 | 224.3 | 233.9 |  |
|  | 0.7 | 215.5 | 223.8 | 223.6 | 233.7 |  |
|  | 0.8 | 215.1 | 223.8 | 222.8 | 233.9 |  |
|  | 0.9 | 215.7 | 223.6 | 222.4 | 233.9 |  |
|  | 1 | 215.2 | 223.9 | 221.4 | 234.1 |  |
| Benzene–propan-2-ol | | | | | | |
|  | 0 | 233.8 | 238.0 | 238.0 | 238.6 | 212.4 |
|  | 0.1 | 226.3 | 232.6 | 232.8 | 237.4 | 209.5 |
|  | 0.2 | 223.7 | 229.8 | 230.8 | 236.6 | 207.8 |
|  | 0.3 | 221.9 | 228.2 | 228.9 | 236.3 | 206.6 |
|  | 0.4 | 219.9 | 227.5 | 227.5 | 236.0 | 205.7 |
|  | 0.5 | 218.8 | 226.7 | 226.9 | 235.5 | 205.2 |
|  | 0.6 | 218.5 | 225.5 | 225.8 | 235.5 | 204.5 |
|  | 0.7 | 217.2 | 225.2 | 225.3 | 235.4 | 203.9 |
|  | 0.8 | 217.7 | 225.3 | 225.1 | 235.6 | 203.9 |
|  | 0.9 | 217.3 | 224.8 | 225.1 | 235.6 | 204.1 |
|  | 1 | 218.2 | 225.0 | 224.6 | 235.8 | 204.6 |
